# Supplementary material for: Identification of a Unique Cytotoxic Thieno[2,3-c]Pyrazole Derivative with Potent and Selective Anticancer Effects In Vitro
Source: MDPI journal article supplement (doi:10.3390/biology11060930), 2022-06-18

# Supplemental Figures

# Figure S1a-d

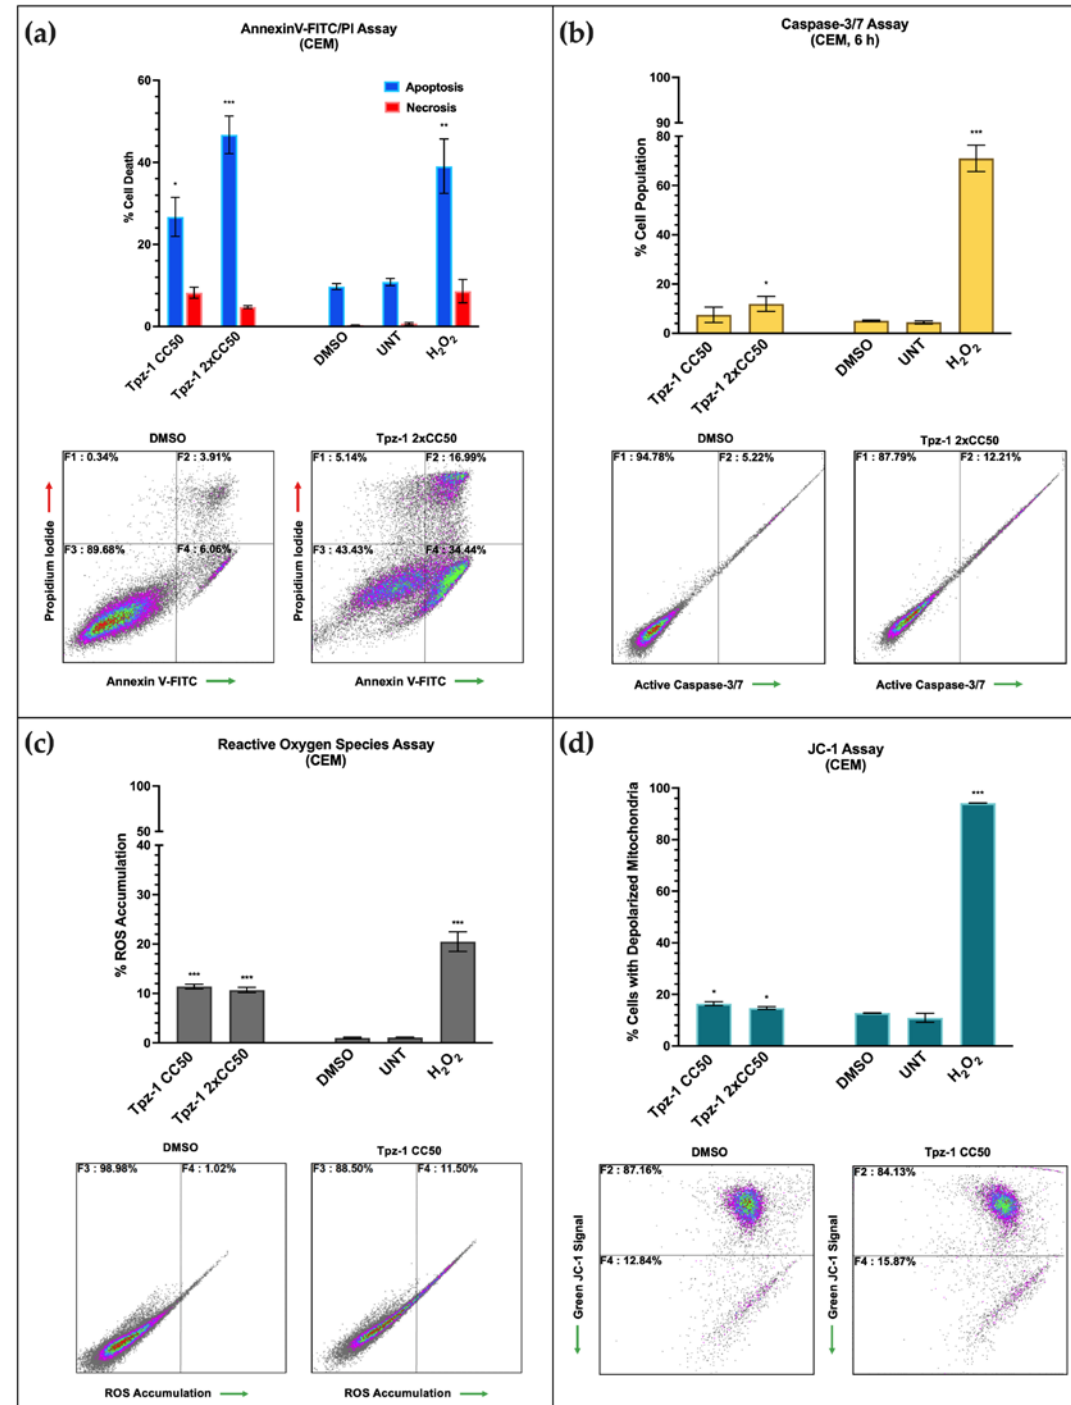

# Figure S1a

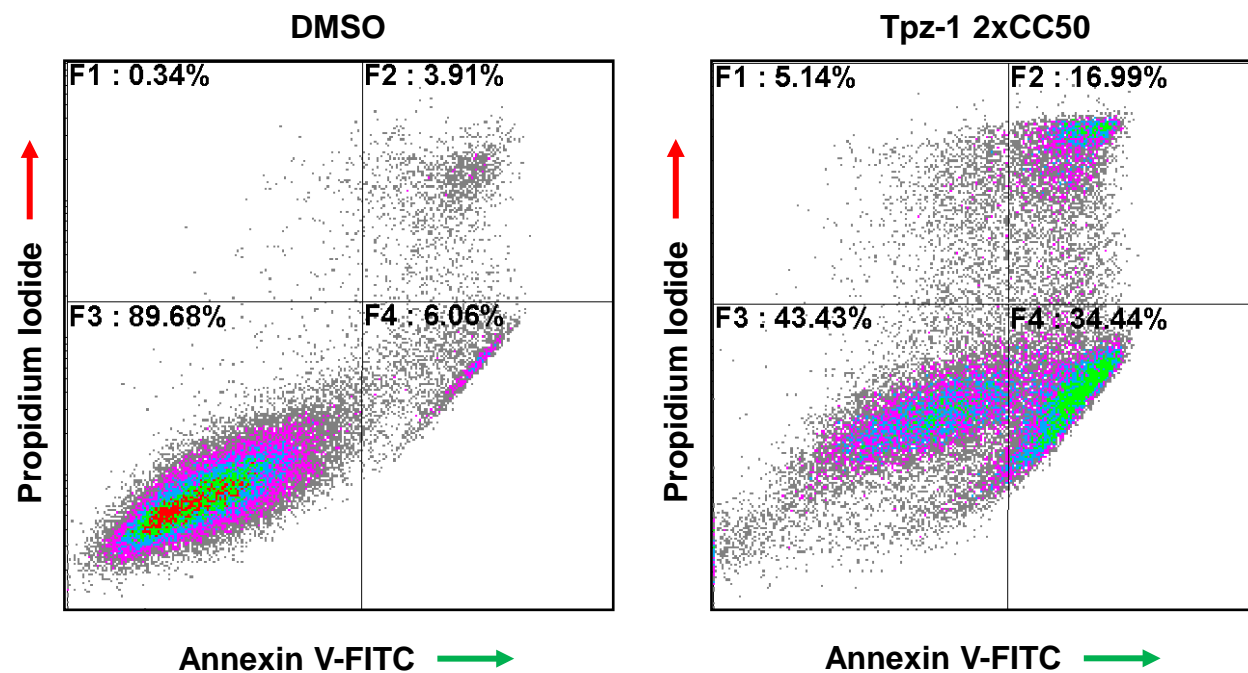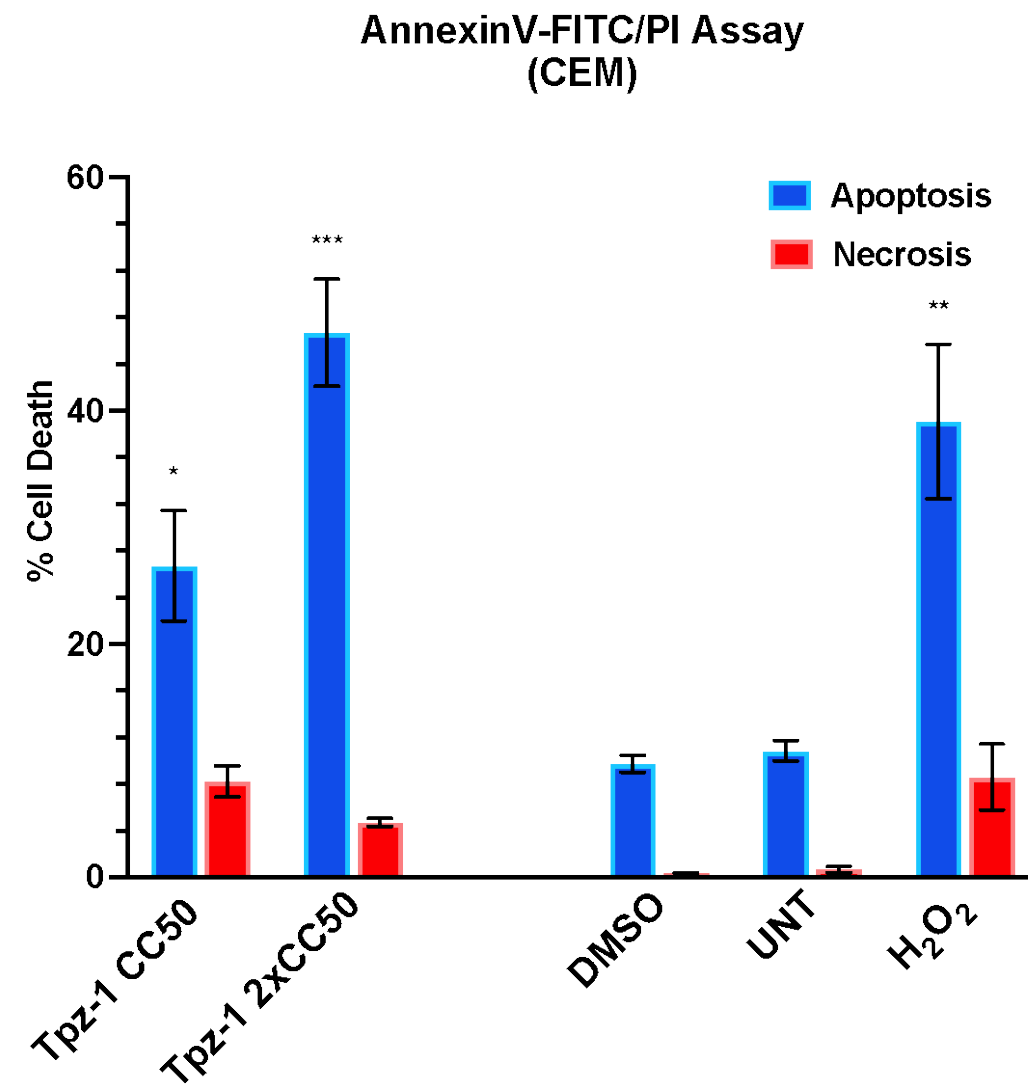

# Figure S1b

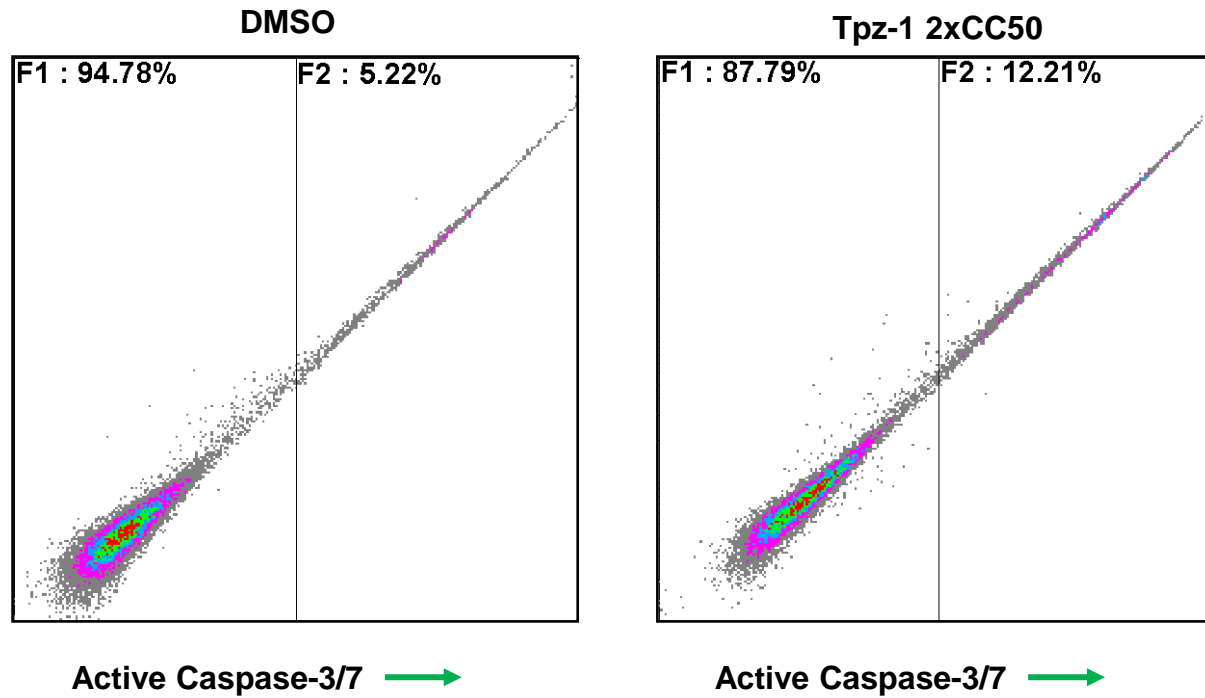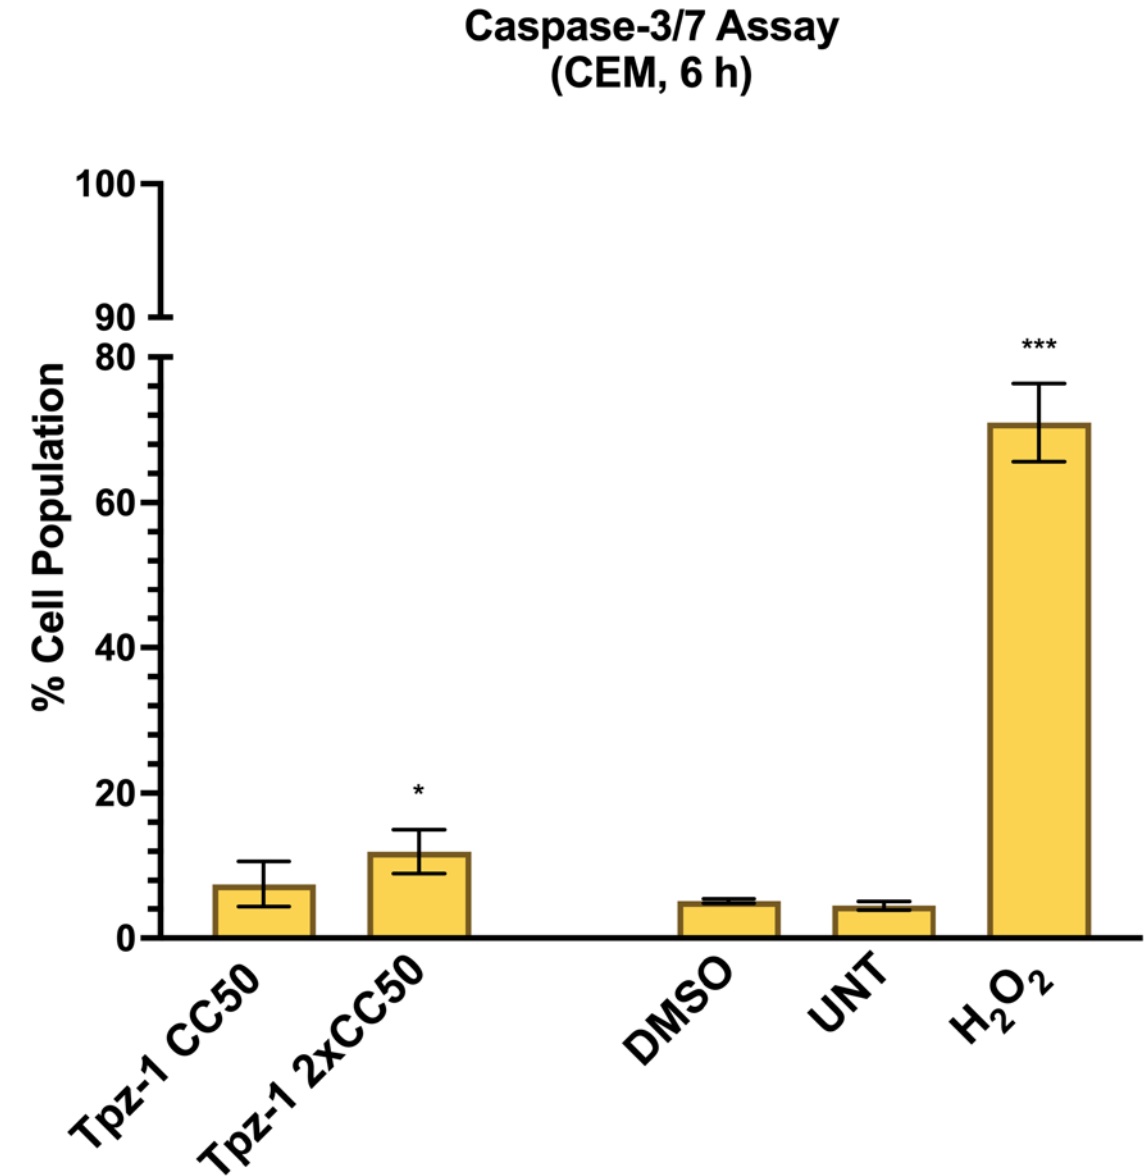

# Figure S1c

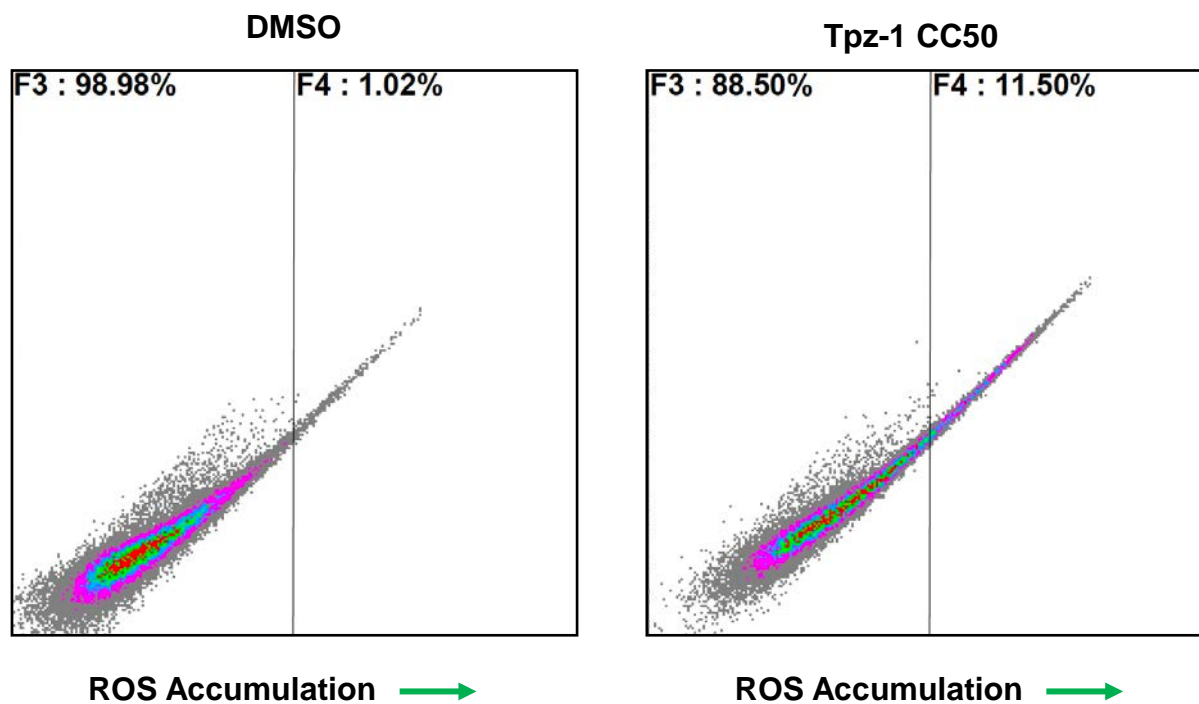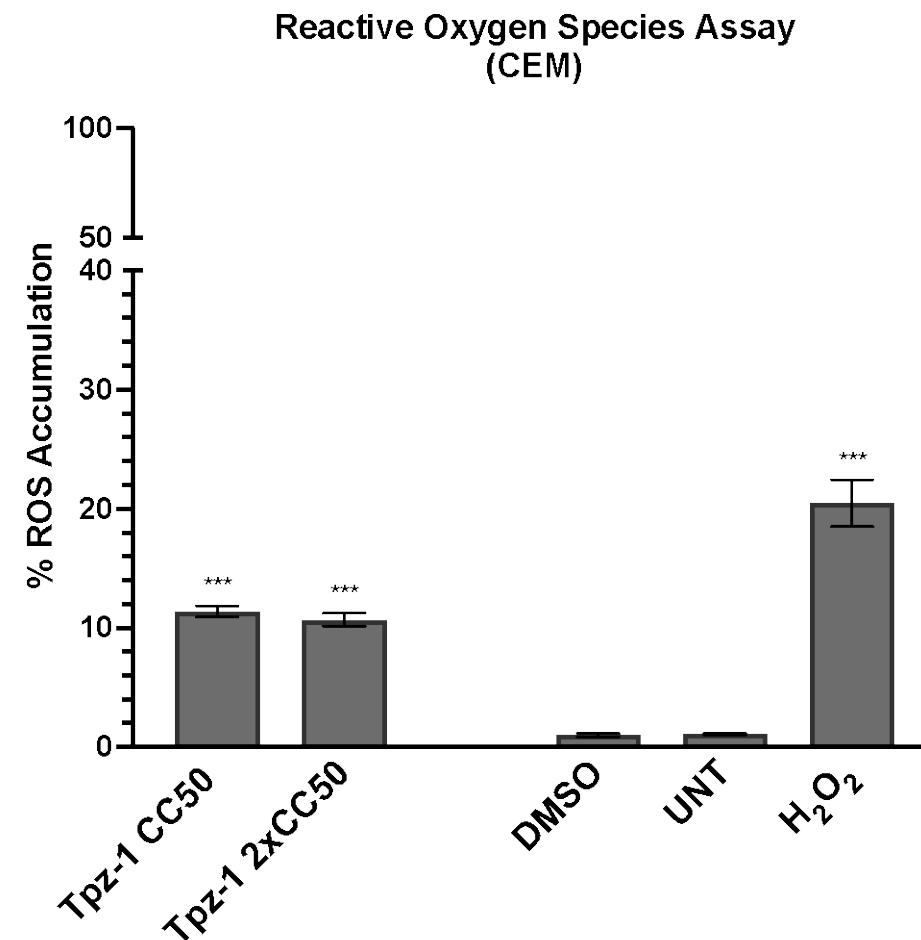

# Figure S1d

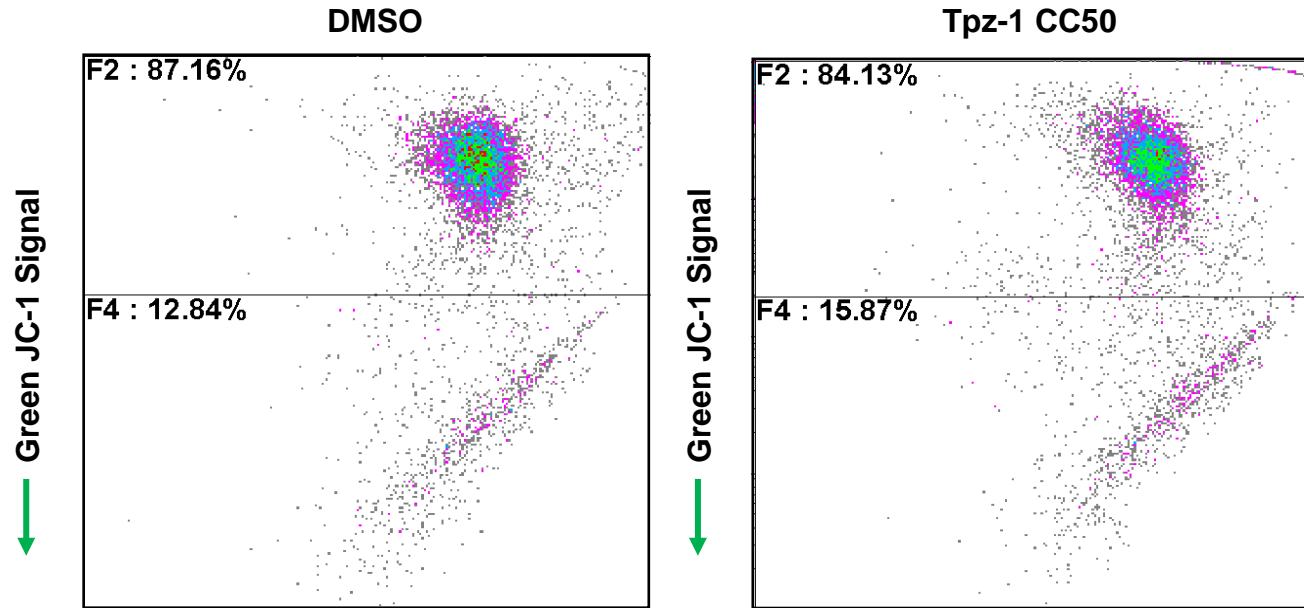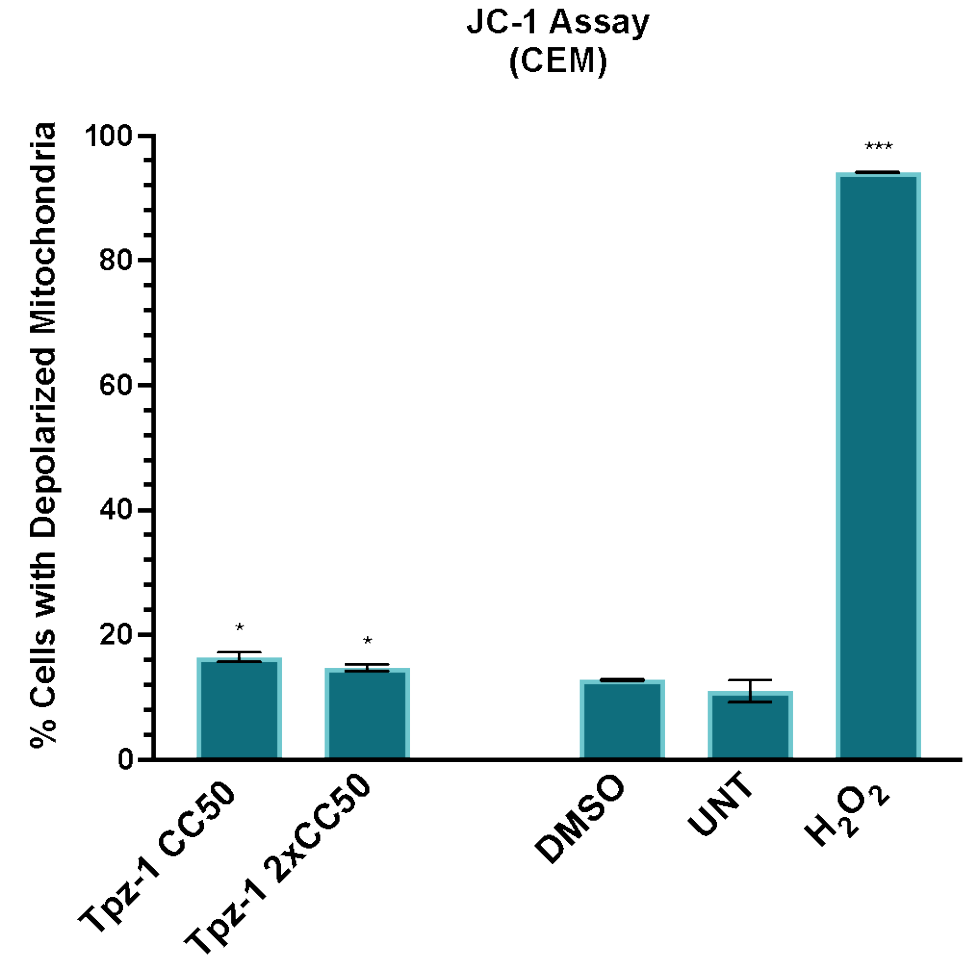

# Figure S2

Caspase-3/7 Assay  
(CEM, 8 h)

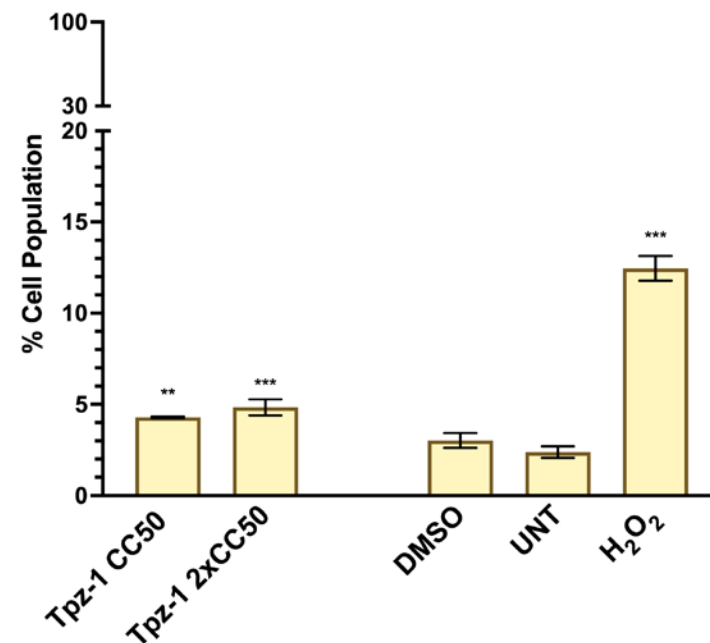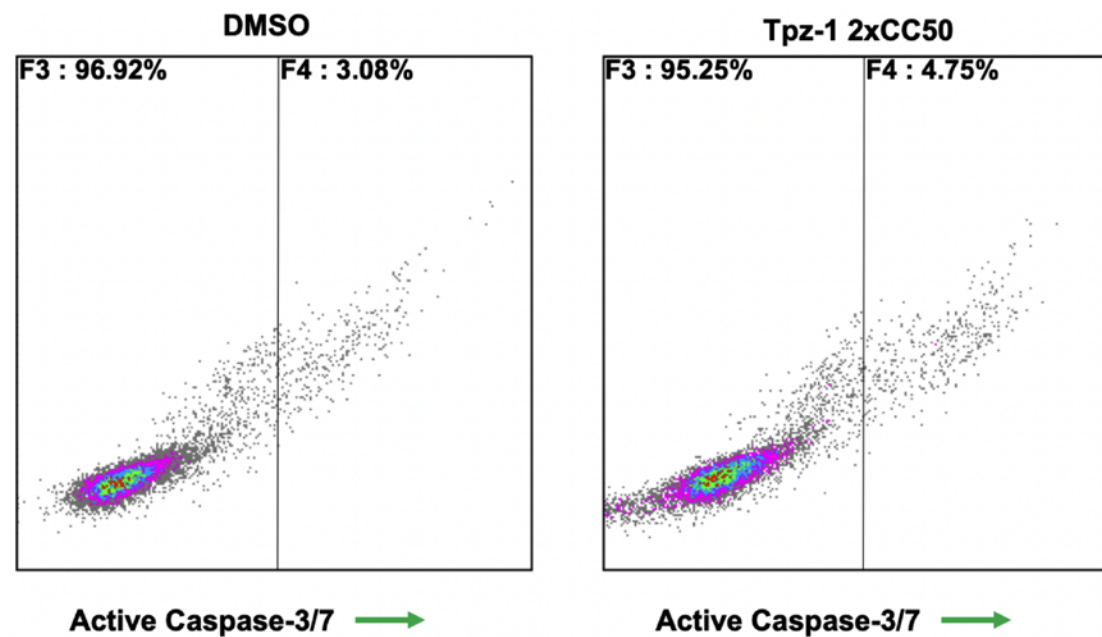

Figure S3

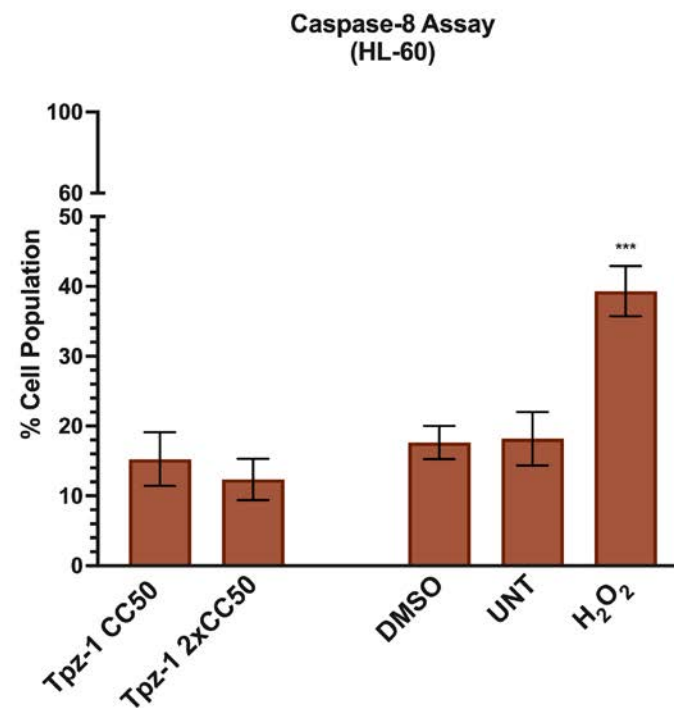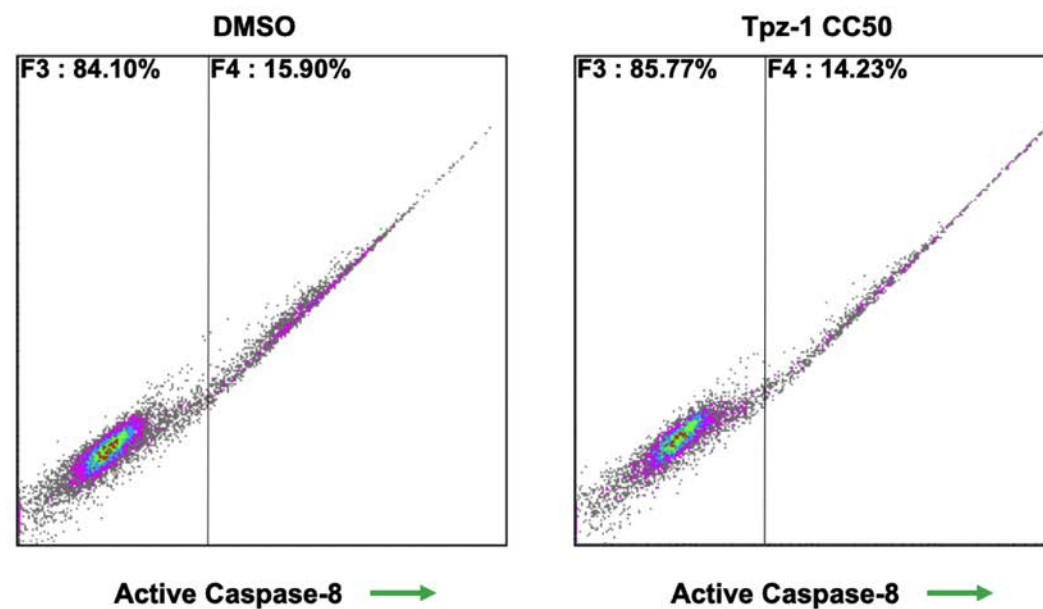



Figure S4a-d

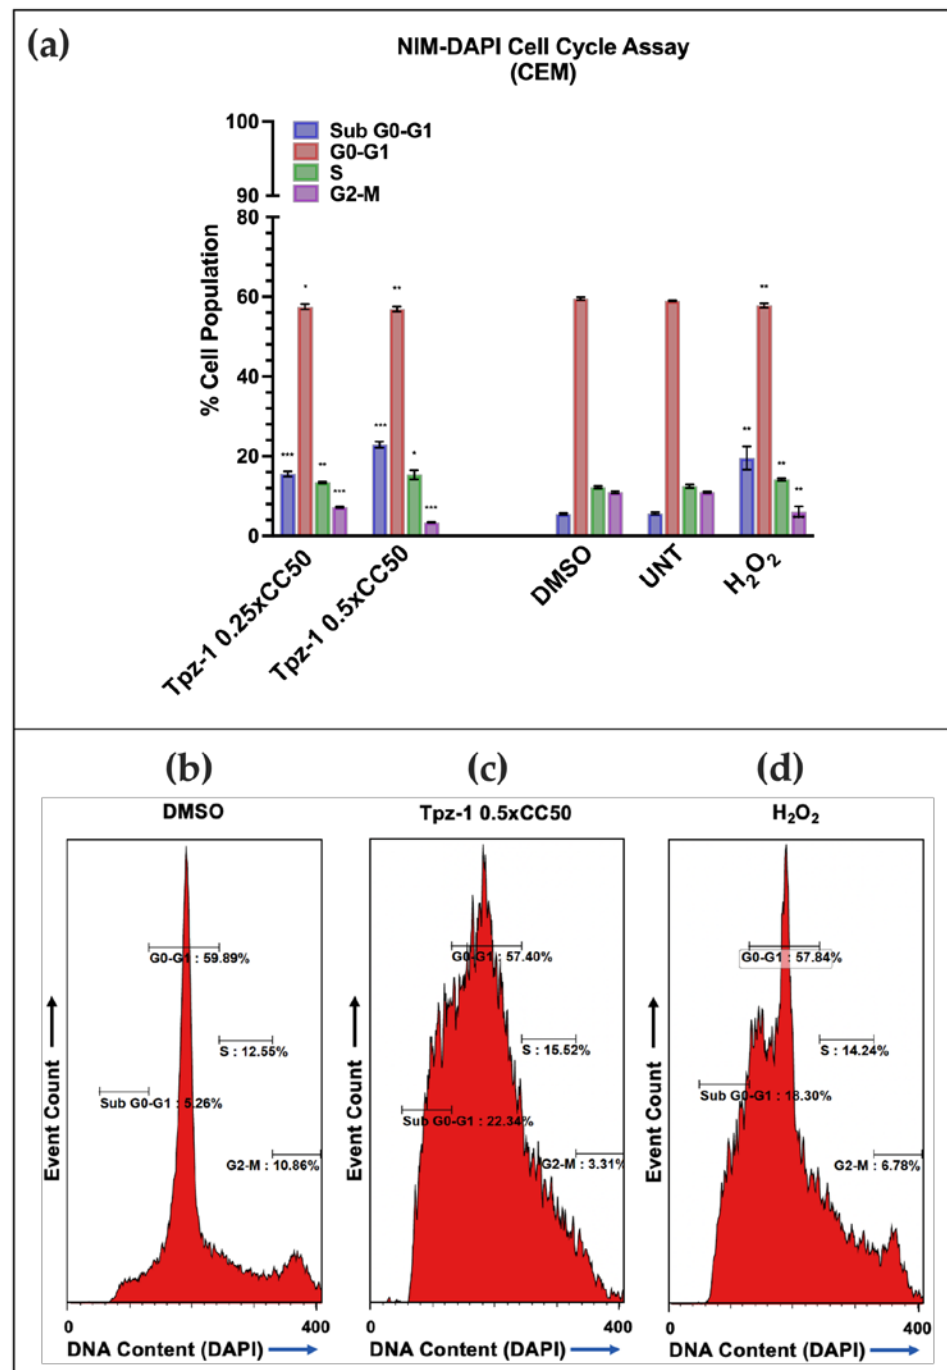

Supplement: s1 [file s1]
